# Supplementary material for: ACVIM consensus statement on diagnosis and management of acute canine thoracolumbar intervertebral disc extrusion
Source: PubMed Central journal article supplement — J Vet Intern Med. 2022 Jul 25;36(5):1570–96. doi: 10.1111/jvim.16480 (PMC9511077; doi:10.1111/jvim.16480), 2022-07-25
Supplement: JVIM-36-1570-s001.pdf [file JVIM-36-1570-s001.pdf]

## **The ACVIM TL-IVDE Consensus Panel**

Authors listed in alphabetical order.

### **Co-Chairs:**

Sarah A. Moore: Department of Veterinary Clinical Sciences, College of Veterinary Medicine, The Ohio State University, Columbus, Ohio, USA  
ORCID: 0000-0002-4311-619

Natasha J. Olby: Department of Clinical Sciences, College of Veterinary Medicine, North Carolina State University, Raleigh, North Carolina, USA  
ORCID: 0000-0003-1349-3484

### **Panelists:**

Brigitte Brisson: Department of Clinical Studies, Ontario Veterinary College, Guelph, Ontario, Canada  
ORCID: 0000-0002-9646-0815

Joe Fenn: Department of Clinical Science and Services, Royal Veterinary College, London, United Kingdom  
ORCID: 0000-0001-7851-670X

Thomas Flegel: Department for Small Animals, Leipzig University, Leipzig, Germany  
0000-0001-9892-0224

Gregg Kortz: VCA Sacramento Veterinary Referral Center, Sacramento, California, USA

Melissa Lewis: VCA Sacramento Veterinary Referral Center, UC Davis, California, USA  
ORCID: 0000-0001-6643-191X

Andrea Tipold: Department of Veterinary Clinical Sciences, Purdue University, West Lafayette, Indiana, USA  
ORCID: 0000-0002-9421-942X
